# Supplementary material for: Morphologies and magnetic properties of α-Fe2O3 nanoparticles calcined at different temperatures
Source: Royal Society of Chemistry journal article supplement (doi:10.1039/d3cp04520j), 2023-12-21
Supplement: d3cp04520j1.pdf [file d3cp04520j1.pdf]

## Morphologies and Magnetic Properties of $\alpha$ -Fe<sub>2</sub>O<sub>3</sub> Nanoparticles with Calcined at Different Temperatures

Xue-Min He,<sup>a,b,c</sup> Duan-Qing Chen,<sup>a,b</sup> Kun-Yu Su,<sup>b</sup> Zhen-Fei Yu,<sup>a</sup> Yi Zhang,<sup>d</sup> and Wei Zhong<sup>\*c</sup>

---

<sup>a</sup>Jiangsu Provincial Engineering Research Center of Low Dimensional Physics and New Energy, Research Center of Information Physics and College of Science, Nanjing University of Posts and Telecommunications, Nanjing 210023, P. R. China

<sup>b</sup>College of Electronic and Optical Engineering, Nanjing University of Posts and Telecommunications, Nanjing 210023, P. R. China

<sup>c</sup>National Laboratory of Solid State Microstructures, Nanjing University, Nanjing 210093, P. R. China

<sup>d</sup>Department of Physics, Mathematics & Science College, Shanghai Normal University, Shanghai 200234, P. R. China

**Figure S1.** XRD refinement results of  $\alpha$ -Fe<sub>2</sub>O<sub>3</sub> samples prepared at different calcination temperatures: (a) 300°C, (b) 400°C, (c) 500°C, (d) 600°C, (e) 700°C, (f) 800°C, (g) 900°C.

**Figure S2.** Histogram of the size distribution of  $\alpha$ -Fe<sub>2</sub>O<sub>3</sub> samples prepared at different calcination temperatures: (a) 300°C, (b) 400°C, (c) 500°C, (d) 600°C, (e) 700°C, (f) 800°C, (g) 900°C.

**Figure S3.** Room-temperature hysteresis loops of  $\alpha$ -Fe<sub>2</sub>O<sub>3</sub> samples prepared at different calcination temperatures after magnetic phase separation: (a) 300°C, (b) 400°C, (c) 500°C, (d) 600°C, (e) 700°C, (f) 800°C, (g) 900°C.

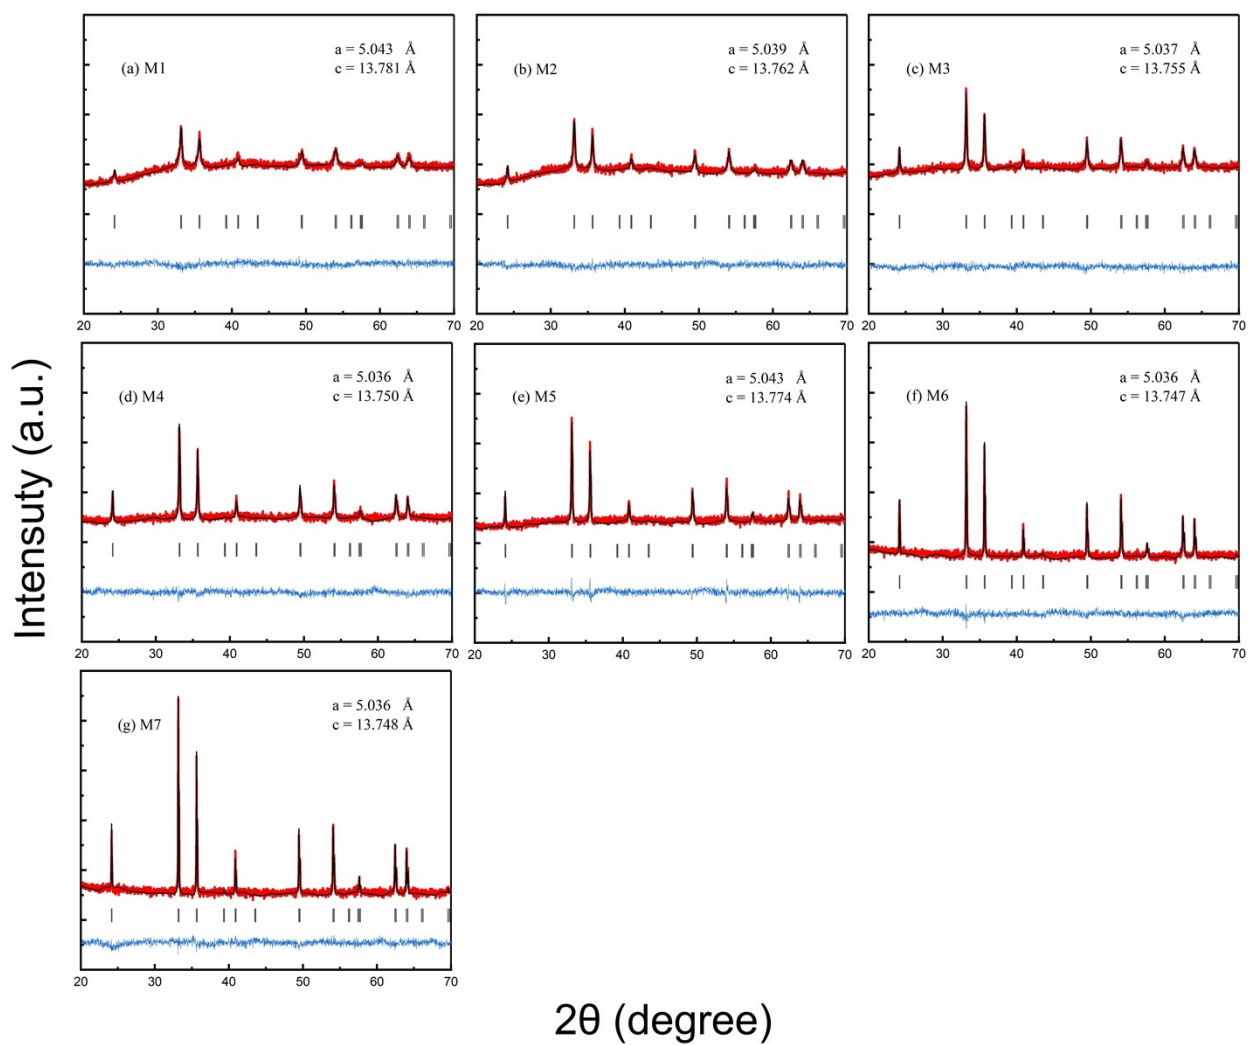

**Figure S1.** XRD refinement results of  $\alpha$ - $\text{Fe}_2\text{O}_3$  samples prepared at different calcination temperatures: (a) 300°C, (b) 400°C, (c) 500°C, (d) 600°C, (e) 700°C, (f) 800°C, (g) 900°C.

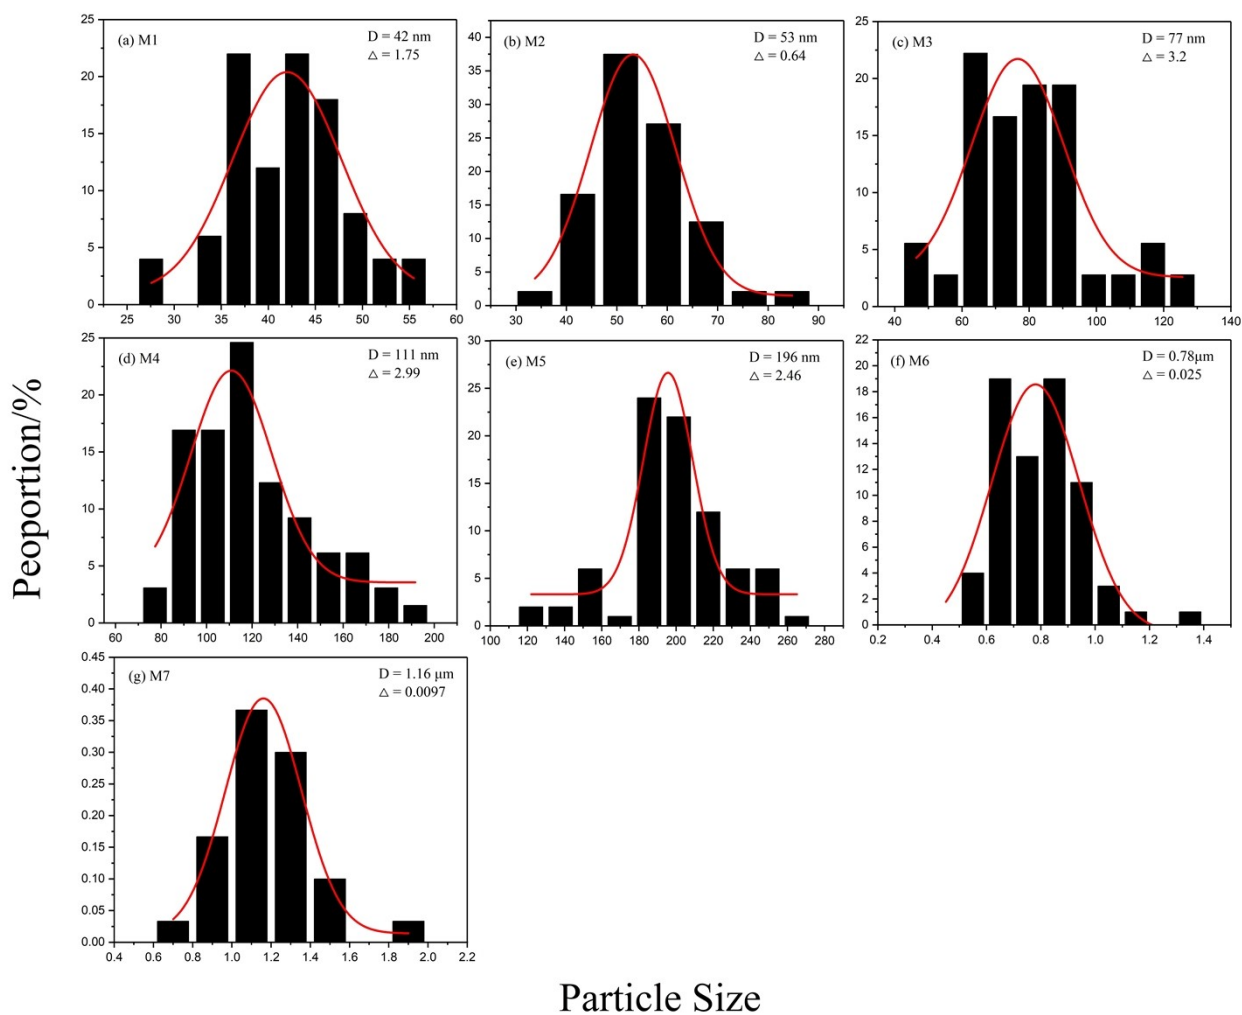

**Figure S2.** Histogram of the size distribution of  $\alpha\text{-Fe}_2\text{O}_3$  samples prepared at different calcination temperatures: (a) 300°C, (b) 400°C, (c) 500°C, (d) 600°C, (e) 700°C, (f) 800°C, (g) 900°C.

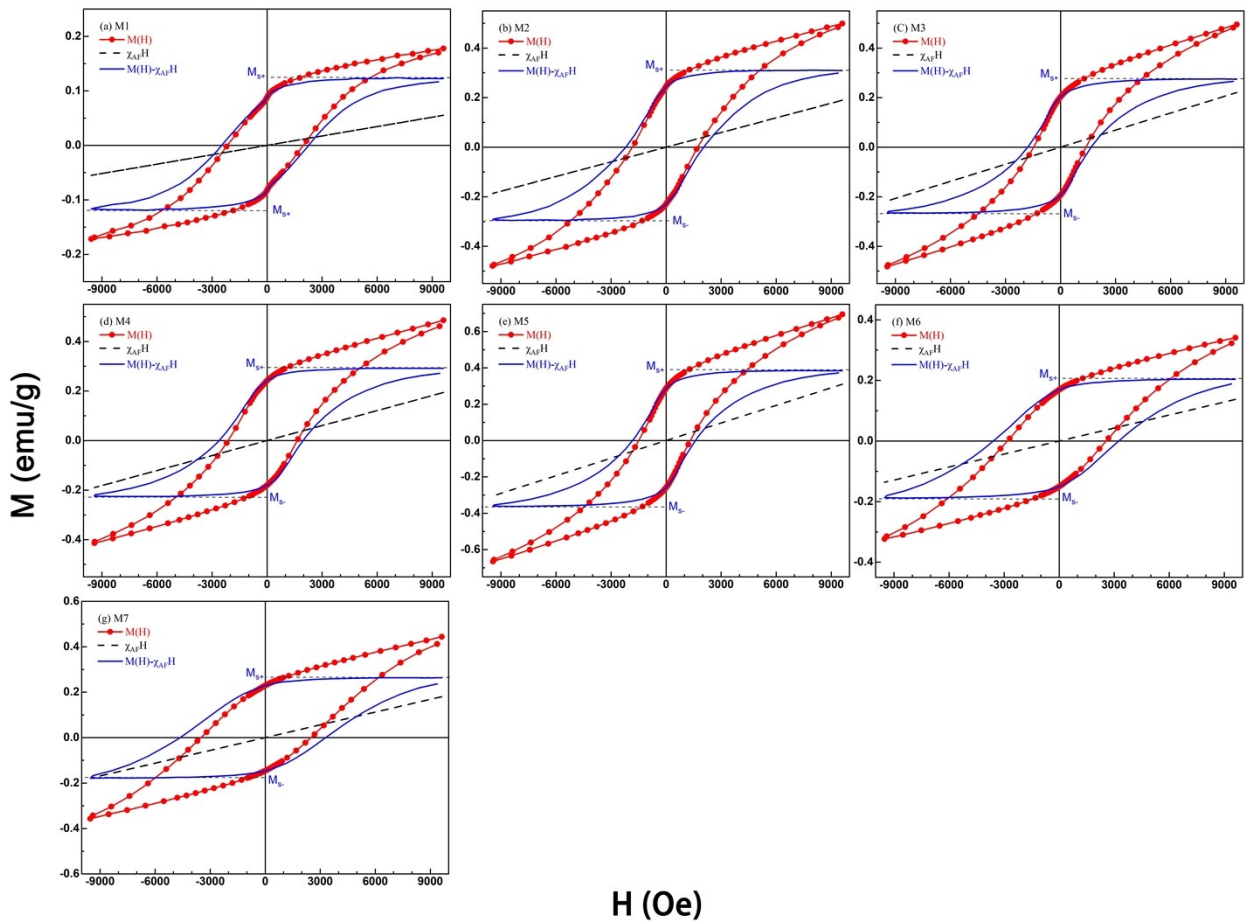

**Figure S3.** Room-temperature hysteresis loops of  $\alpha$ -Fe<sub>2</sub>O<sub>3</sub> samples prepared at different calcination temperatures after magnetic phase separation: (a) 300°C, (b) 400°C, (c) 500°C, (d) 600°C, (e) 700°C, (f) 800°C, (g) 900°C.
